# Supplementary material
Source: PubMed Central journal article supplement (PMC1559885)
Supplement: rspb20053175s04.pdf [file rspb20053175s04.pdf]

# **ELECTRONIC APPENDIX**

This is the Electronic Appendix to the article

Rapidly shifting environmental baselines among  
fishers of the Gulf of California

by

Andrea Sáenz–Arroyo, Callum M. Roberts, Jorge Torre,  
Micheline Cariño-Olvera, and Roberto R. Enríquez-Andrade

*Proc. R. Soc. B* ([doi:10.1098/rspb.2005.3175](https://doi.org/10.1098/rspb.2005.3175))

Electronic appendices are refereed with the text; however, no attempt is made  
to impose a uniform editorial style on the electronic appendices.

# Electronic Appendix for Sáenz, Roberts, Torre, Cariño-Olvera and Enriquez Andrade: Rapidly Shifting Environmental Baselines Among Fishers of the Sea of Cortez.

## 1. Questionnaire

1. Date \_\_\_\_\_

2. Profession \_\_\_\_\_

3. Sea of Cortez site most frequently visited

(Please locate your main fishing area in the attached map)

\_\_\_\_\_

4. Age \_\_\_\_\_

5. Years fishing in the Sea of Cortez \_\_\_\_\_

6. Do you own a boat? \_\_\_\_\_

7. Gender      F ( )      M ( )

8. How would you describe the condition of the fishery stocks the Gulf of California?

Underfished ( )    Fully exploited ( )    Depleted ( )    Severely depleted ( )

9. Do you think that fishing has depleted stocks of any exploited species?

Yes ( )                      No ( )                      I do not know ( )

If your answer was yes, which species do you consider to be depleted?

10. Are there any places in the Gulf of California that were once productive fishing grounds but are now depleted?

(Please locate the places in the attached map)

Yes ( )                      No ( )                      I do not know ( )

If the answer was yes, list those places that were formerly productive.

11. Do you know of any species that were once important in commercial or sport fisheries but are no longer or very rarely caught?

Yes ( )                      No ( )                      I do not know ( )

If your answer was yes, list each species and the main cause you think was responsible for their disappearance.

**Gulf Grouper (Garropa)**

1. Have you ever caught a Gulf grouper (*Mycteroperca jordani*)?

Yes ( )                      No ( )

i. If your answer was yes, what was the size of a the largest fish of this species you ever caught

\_\_\_\_\_cm.

\_\_\_\_\_ Kilograms.

In which year was it? \_\_\_\_\_

Where was it caught?\_\_\_\_\_

What type of fishing gear was it?\_\_\_\_\_

ii. How many Gulf groupers did you catch in the best day you ever had?

\_\_\_\_\_

In which month was it? \_\_\_\_\_

In which year?\_\_\_\_\_

Where was it caught?\_\_\_\_\_

Table 1. Details of the sample of fishers in the central Sea of Cortez. Numbers obtained from <sup>1</sup>Dirección de Fomento Pesquero <sup>2</sup>Loreto Bay National Park Programa de Ordenamiento Pesquero, <sup>3</sup>Sociedad de Historia Natural “Niparáj” censo de embarcaciones pesqueras. The age distribution of the population for each location was extracted from INEGI (2002) [XII Censo General de Población y Vivienda 2000. Tabulados Básicos. Instituto Nacional de Geografía Estadística e Informática. 357 pp].

|                                               | COMMUNITIES SAMPLED                  |                                          |                          |                                    | TOTAL NUMBER<br>OF FISHERS<br>FROM EACH<br>AGE CLASS |
|-----------------------------------------------|--------------------------------------|------------------------------------------|--------------------------|------------------------------------|------------------------------------------------------|
|                                               | Santa Rosalía<br>San Bruno<br>Mulegé | Loreto<br>San Nicolás<br>Ensenada Blanca | Agua Verde<br>Tembabichi | Punta Alta<br>Los Burros<br>Nopoló |                                                      |
| <b>TOTAL NUMBER<br/>OF FISHERS</b>            | 920 <sup>1</sup>                     | 326 <sup>2</sup>                         | 116 <sup>3</sup>         | 45 <sup>3</sup>                    |                                                      |
| <b>NUMBER<br/>INTERVIEWED</b>                 | 20                                   | 9                                        | 7                        | 4                                  | <b>40</b>                                            |
| <b>15-30<br/>NUMBER<br/>INTERVIEWED</b>       | 15                                   | 9                                        | 6                        | 4                                  | <b>34</b>                                            |
| <b>31-54<br/>NUMBER<br/>INTERVIEWED</b>       | 14                                   | 12                                       | 5                        | 3                                  | <b>34</b>                                            |
| <b>≥ 55<br/>TOTAL FISHERS<br/>INTERVIEWED</b> | 49                                   | 30                                       | 18                       | 11                                 | <b>108</b>                                           |
